# Supplementary material for: A zero-thermal-quenching perovskite-like phosphor with an ultra-narrow-band blue-emission for wide color gamut backlight display applications
Source: Royal Society of Chemistry journal article supplement (doi:10.1039/d1tc03317d), 2021-01-01
Supplement: d1tc03317d1.pdf [file d1tc03317d1.pdf]

## Supporting information

### A zero-thermal-quenching perovskite-like phosphor with ultra-narrow-band blue-emitting for wide color gamut backlight display application

Zhihua Leng <sup>a\*</sup>, Dan Zhang <sup>b</sup>, Hao Bai <sup>a</sup>, Hongbo He <sup>a</sup>, Qing Qing <sup>a</sup>, Jin Zhao <sup>c</sup>,  
Zuobin Tang <sup>a</sup>

<sup>a</sup> School of Chemistry and Chemical Engineering, Xi'an University of Architecture and Technology, Xi'an 710055, P. R. China;

<sup>b</sup> College of Chemistry, Jilin University, Changchun 130026, P. R. China;

<sup>c</sup> College of Science, Xi'an University of Architecture and Technology, Xi'an, 710055, P. R. China

E-mail address: [lengzh@xauat.edu.cn](mailto:lengzh@xauat.edu.cn) (Corresponding author: Zhihua Leng)

**Table S1** Crystallographic parameters obtained from XRD Rietveld refinement for BGKPOF:0.06Eu<sup>2+</sup> sample.

|                             |                                                          |
|-----------------------------|----------------------------------------------------------|
| Formula                     | K <sub>2</sub> BaPO <sub>4</sub> F:0.015Eu <sup>2+</sup> |
| Space group                 | I 4/mcm (140) - tetragonal                               |
| a=b (Å)                     | 7.0418(7)                                                |
| c (Å)                       | 11.2835(7)                                               |
| $\alpha=\beta=\gamma$ (deg) | 90                                                       |
| Z                           | 4                                                        |
| V (Å <sup>3</sup> )         | 559.53                                                   |
| R <sub>w</sub> p%           | 8.79                                                     |
| R <sub>p</sub> %            | 6.39                                                     |
| $\chi^2$                    | 2.547                                                    |

**Table S2** The final refined atomic coordinates and occupancy for the as-obtained KBPOF:0.015Eu<sup>2+</sup> sample.

| atom | x          | y          | z          | U <sub>iso</sub> |
|------|------------|------------|------------|------------------|
| K1   | 0.50000(0) | 0.50000(0) | 0.75000(0) | 0.01023          |
| Ba1  | 0.17743(0) | 0.32257(0) | 0.50000(0) | 0.01150          |
| P1   | 0.50000(0) | 0          | 0.25000(0) | 0.00821          |
| O1   | 0.37550(1) | 0.12450(0) | 0.32754(3) | 0.01524          |
| F1   | 0.50000(0) | 0.50000(0) | 0.50000(0) | 0.01305          |

**Table S3** Main bond lengths (Å) and average bond length (R<sub>av</sub>) of KBPOF:1.5%Eu<sup>2+</sup> sample.

| Vector | Length   | Vector | Length   |
|--------|----------|--------|----------|
| Ba1–F1 | 2.820(9) | K1–F1  | 2.592(5) |
| Ba1–F1 | 2.820(9) | K1–F1  | 2.592(5) |
| Ba1–O1 | 2.920(0) | K1–O1  | 2.770(8) |
| Ba1–O1 | 2.920(0) | K1–O1  | 2.906(2) |
| Ba1–O1 | 2.920(0) | K1–O1  | 2.906(2) |
| Ba1–O1 | 2.920(0) | K1–O1  | 2.906(2) |
| Ba1–O1 | 2.920(0) | K1–O1  | 2.770(8) |
| Ba1–O1 | 2.920(0) | K1–O1  | 2.906(2) |
| Ba1–O1 | 2.920(0) |        |          |
| Ba1–O1 | 2.920(0) |        |          |

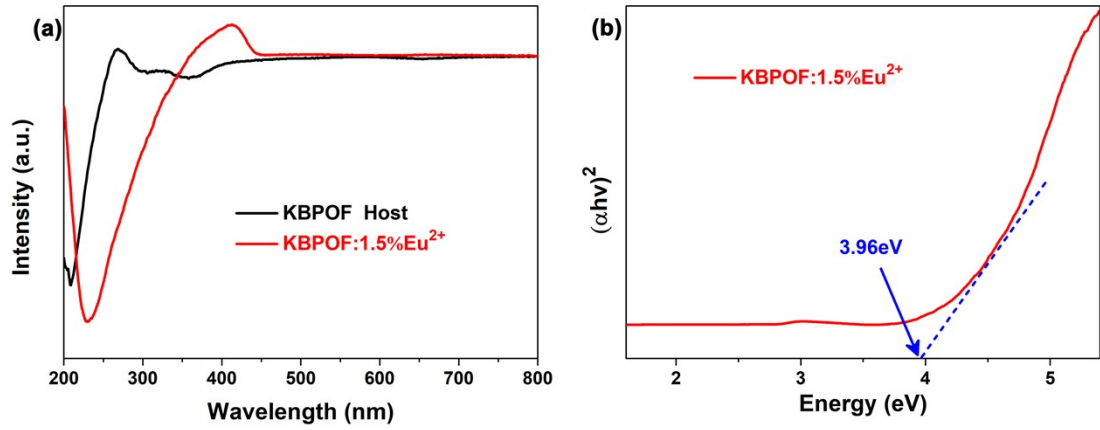

**Fig. S1** (a) Diffuse reflectance spectra of the KBPOF host and KBPOF:1.5%Eu<sup>2+</sup> sample, (b) the extrapolation of band gap energy of KBPOF:1.5%Eu<sup>2+</sup> sample.

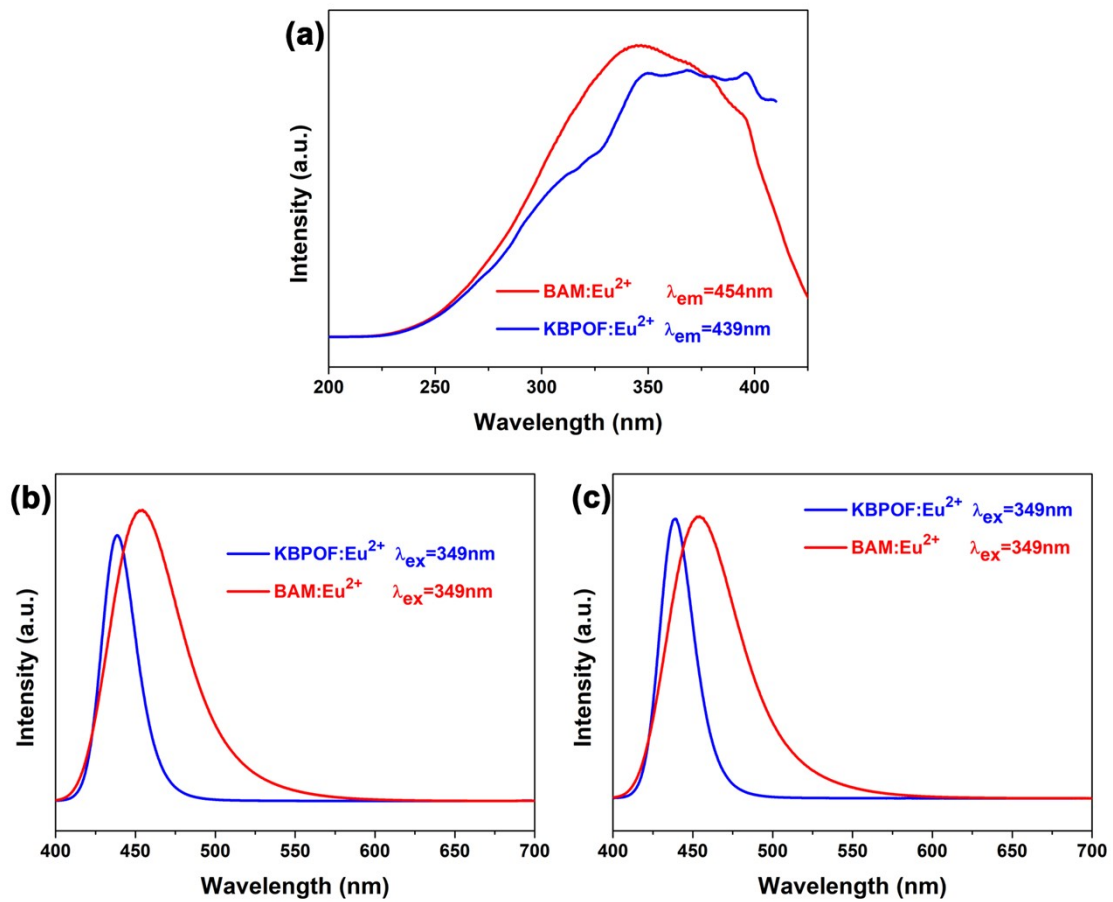

**Fig. S2** Comparison of the (a) excitation and (b, c) emission spectra between the KBPOF:1.5%Eu<sup>2+</sup> sample and commercial BAM:Eu<sup>2+</sup> (BaMgAl<sub>10</sub>O<sub>17</sub>:Eu<sup>2+</sup>) phosphor under identical measurement conditions.

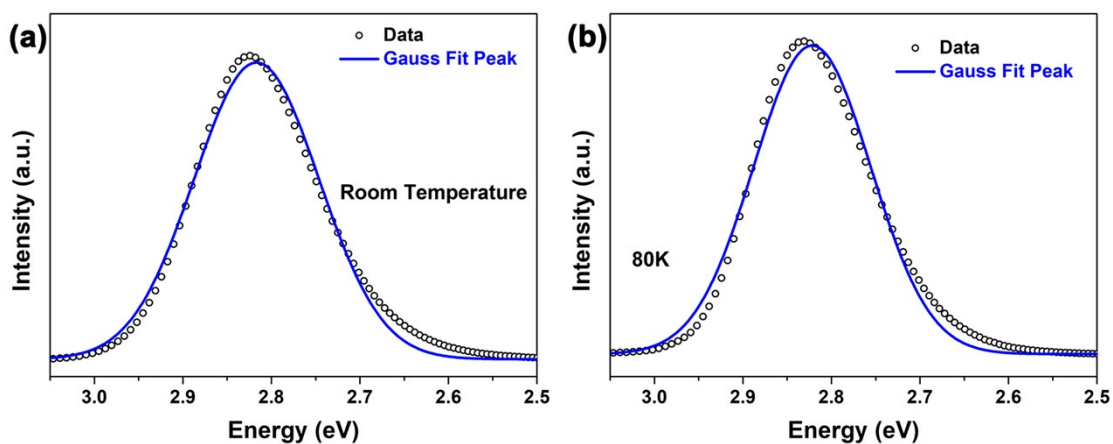

**Fig. S3** Gaussian fitting of the emission band ( $\lambda_{\text{ex}}=380\text{nm}$ ) recorded at (a) room temperature and (b) 80 K.

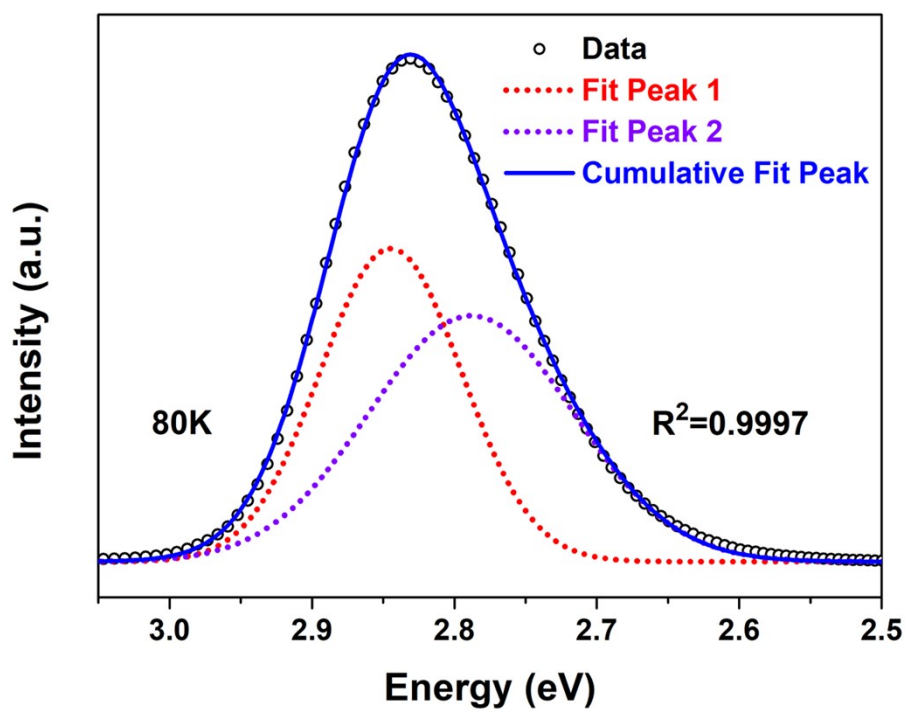

**Fig. S4** Gaussian fitting of the emission band ( $\lambda_{\text{ex}}=380\text{nm}$ , recorded at 80 K) for the KBPOF:1.5%Eu<sup>2+</sup> phosphor.

**Table S4** Ionic radius, average bond length,  $\beta_{\text{ploy}}$  and  $\varepsilon_{\text{cfs}}$  for K(1) and Ba(1) sites.

|                 | Ba(1)            |                  | K(1)           |                  |
|-----------------|------------------|------------------|----------------|------------------|
| CN              | 10               |                  | 8              |                  |
| r               | Ba <sup>2+</sup> | Eu <sup>2+</sup> | K <sup>+</sup> | Eu <sup>2+</sup> |
|                 | 1.52             | 1.35             | 1.51           | 1.25             |
| R <sub>av</sub> | 2.900(2)         |                  | 2.793(9)       |                  |
| DI              | 0.0109           |                  | 0.0402         |                  |
| D <sub>r</sub>  | 11.2%            |                  | 17.2%          |                  |

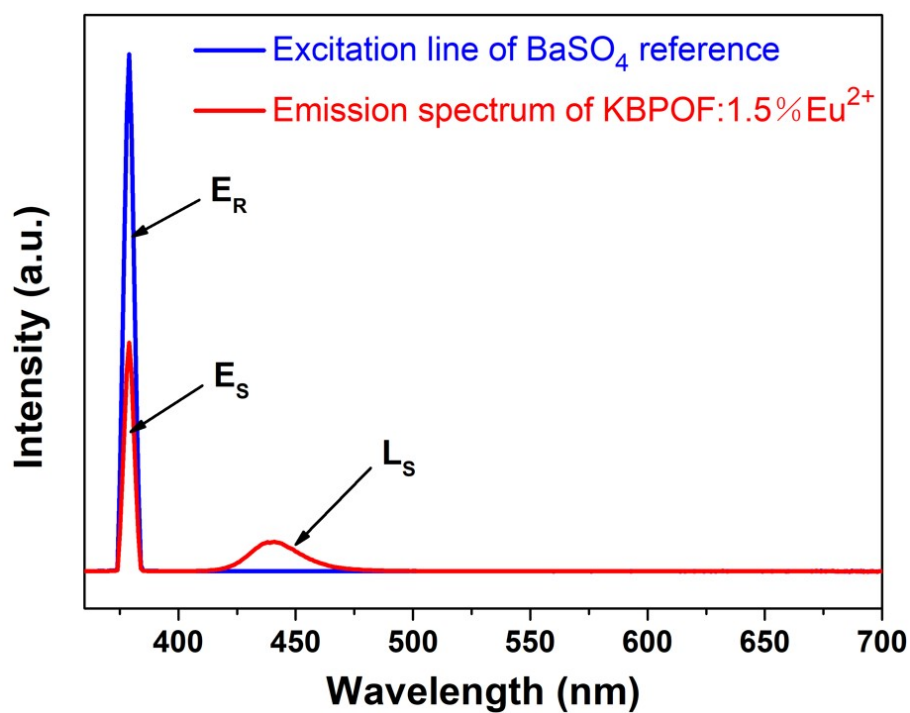

**Fig. S5** Excitation and emission spectra of BaSO<sub>4</sub> reference sample and KBPOF:1.5%Eu<sup>2+</sup> phosphor collected by a spectrofluorometer equipped with an integrating sphere.

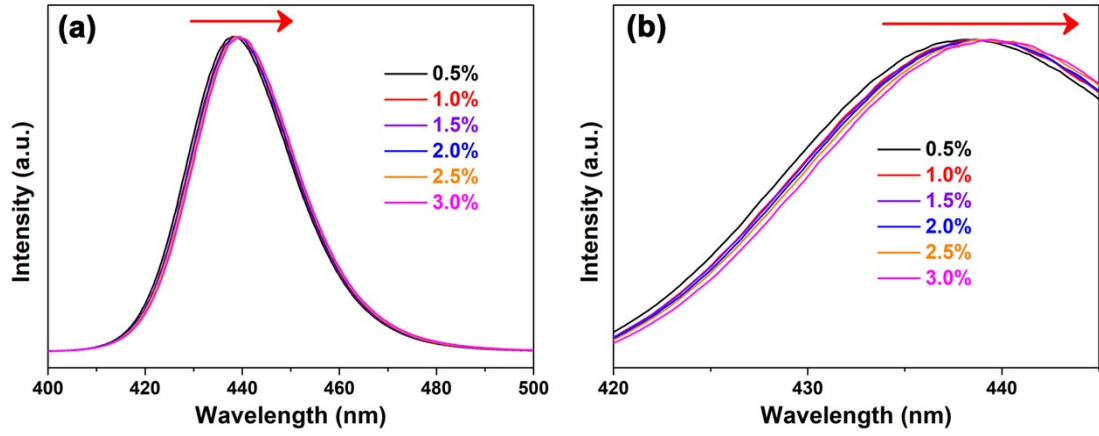

**Fig. S6** (a) Normalized emission spectra and (b) magnified normalized emission spectra of the KBPOF: $x\text{Eu}^{2+}$  samples under 380 nm excitation.

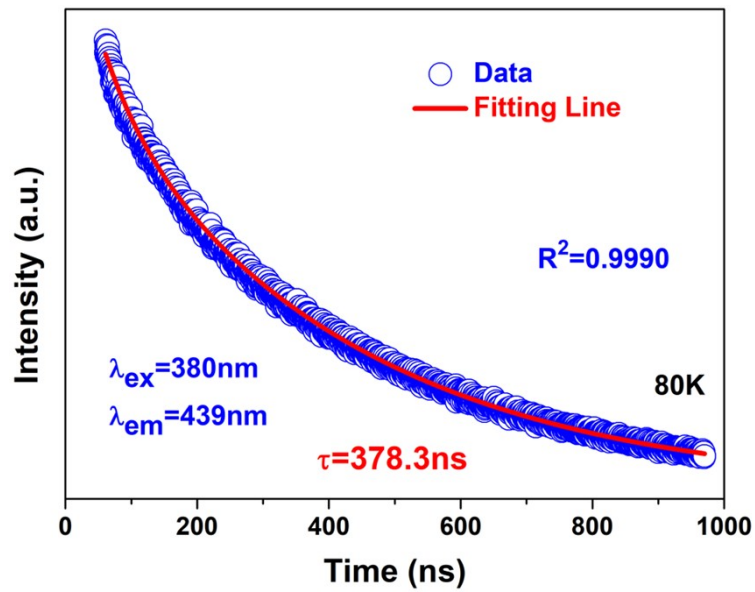

**Fig. S7** Decay curve of the KBPOF:1.5% $\text{Eu}^{2+}$  phosphor recorded at 80 K.

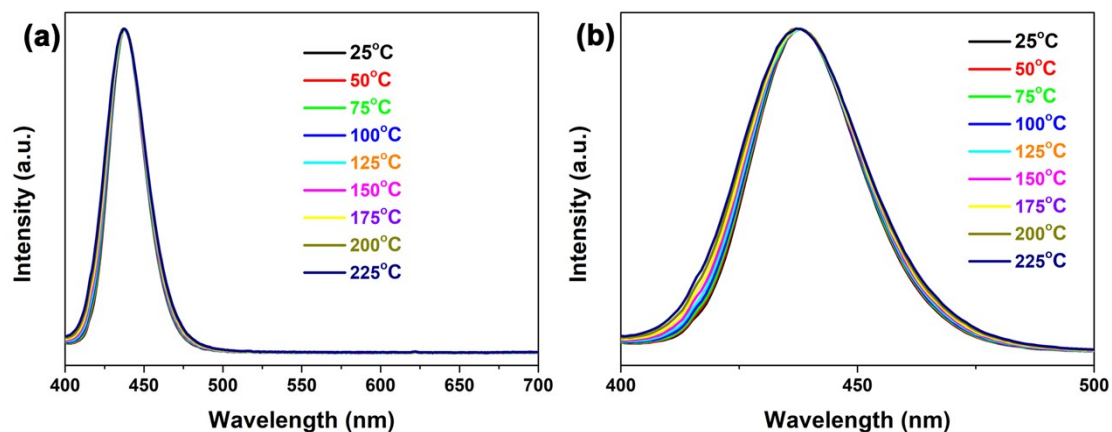

**Fig. S8** (a) Normalized temperature-dependent emission spectra and (b) magnified normalized temperature-dependent emission spectra of the KBPOF:1.5%Eu<sup>2+</sup> sample under 380 nm excitation.

**Table S5** Reliability factors and crystallographic parameters obtained from XRD

Rietveld refinement for the KBPOF:1.5%Eu<sup>2+</sup> sample at different temperatures.

| T (°C) | $\chi^2$ | <i>Rwp</i> % | <i>Rp</i> % | a=b (Å)   | c (Å)      |
|--------|----------|--------------|-------------|-----------|------------|
| 25     | 3.693    | 7.07         | 5.16        | 7.0418(7) | 11.2835(7) |
| 75     | 3.719    | 7.14         | 5.26        | 7.0508(6) | 11.2970(0) |
| 125    | 3.675    | 7.14         | 5.19        | 7.0590(3) | 11.3080(8) |
| 175    | 3.519    | 7.07         | 5.24        | 7.0675(3) | 11.3200(7) |
| 225    | 3.753    | 7.25         | 5.34        | 7.0768(8) | 11.3328(9) |

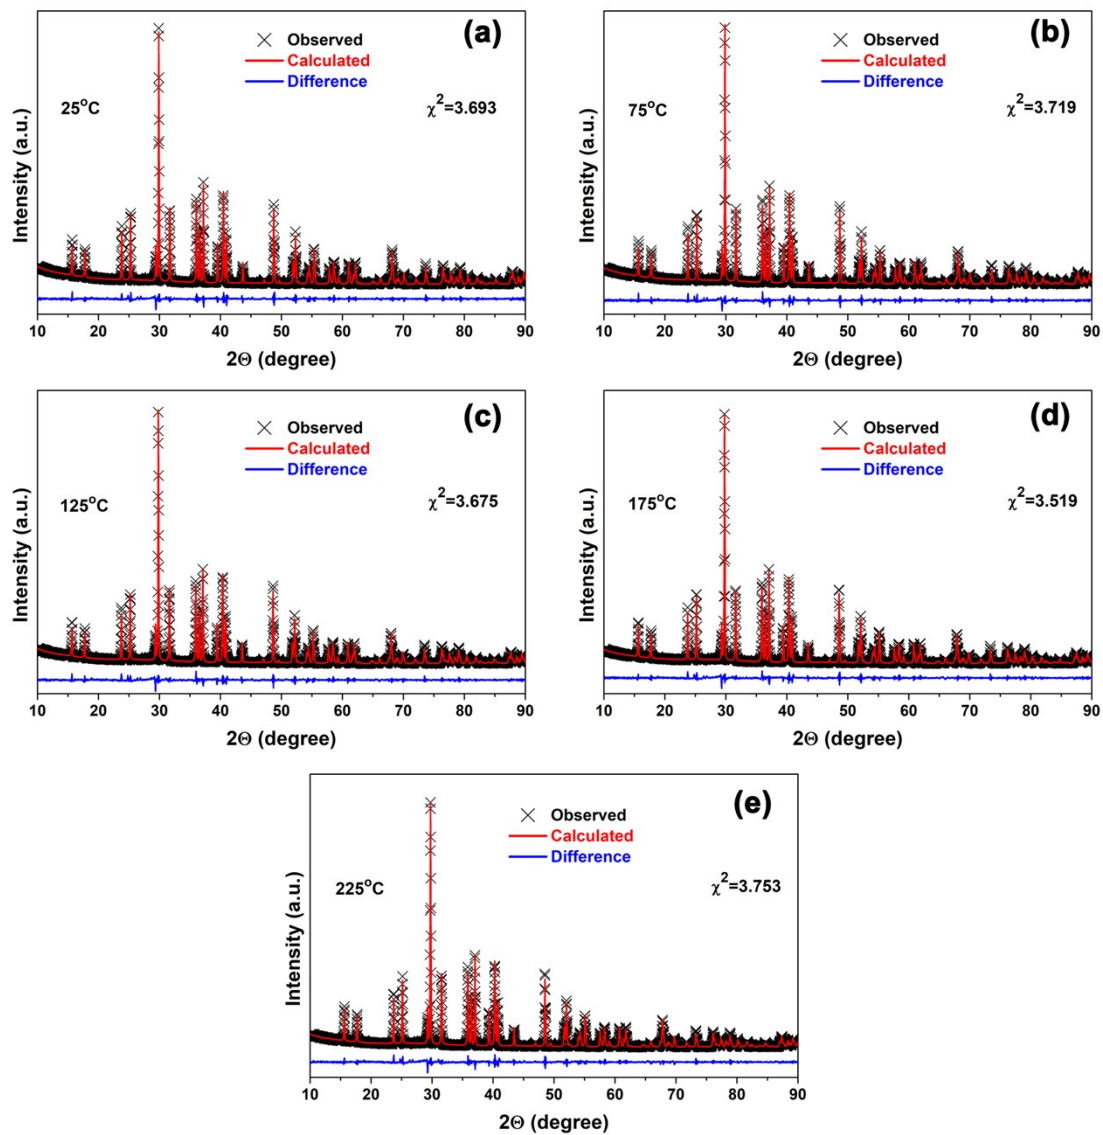

**Fig. S9** XRD refinement results of the KBPOF:1.5%Eu<sup>2+</sup> sample at different temperature: (a) 25 °C, (b) 75 °C, (c) 125 °C, (d) 175 °C and (e) 225 °C.



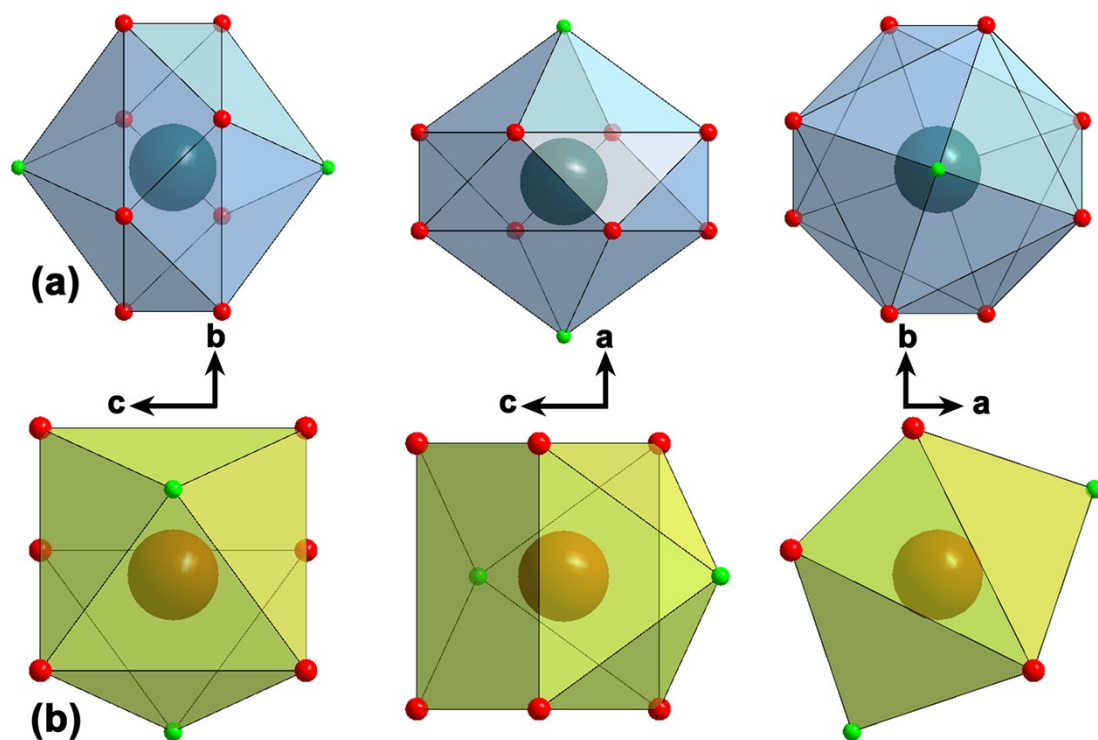

**Fig. S10** (a) BaO<sub>8</sub>F<sub>2</sub> and (b) KO<sub>6</sub>F<sub>2</sub> coordination polyhedrons viewed along the *a*-axis, *b*-axis and *c*-axis direction, respectively.

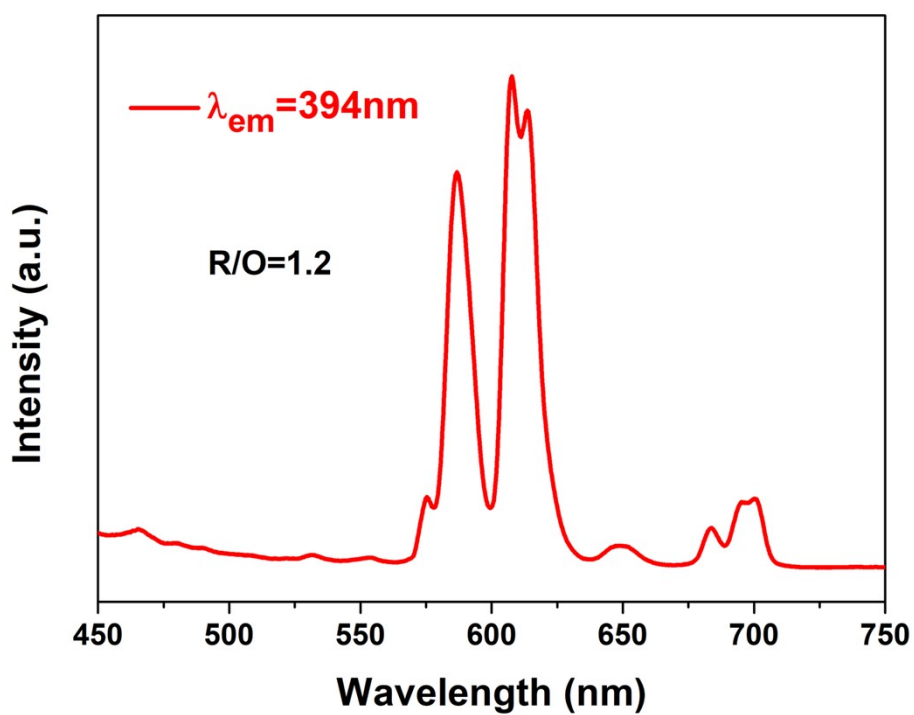

**Fig. S11** Emission spectrum of the KBPOF:1.5%Eu<sup>3+</sup> sample.

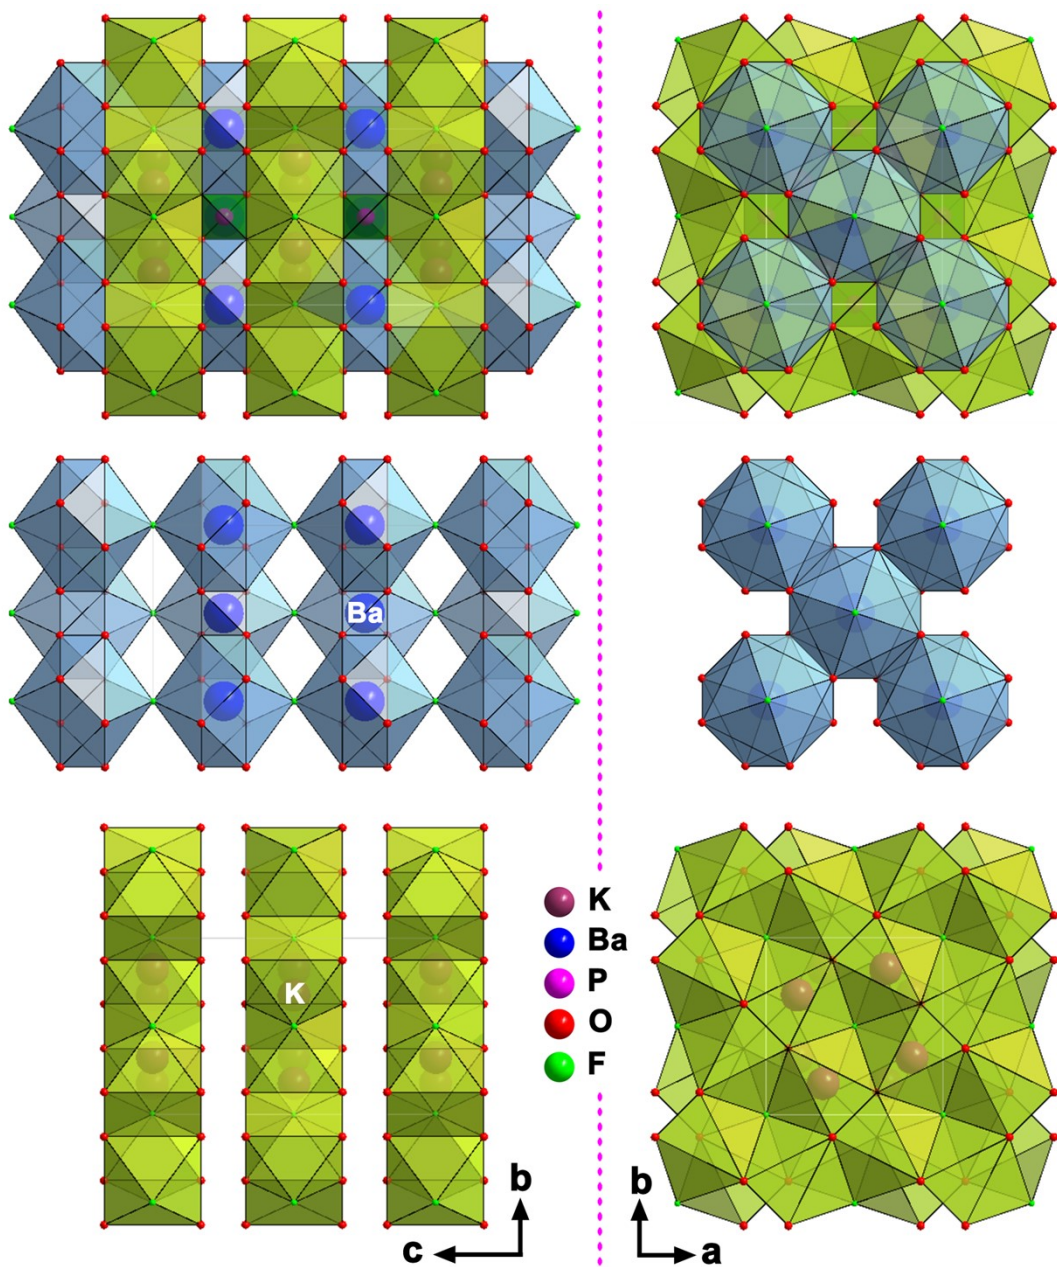

**Fig. S12**  $\text{BaO}_8\text{F}_2$ ,  $\text{KO}_6\text{F}_2$ , and  $\text{PO}_4$  coordination polyhedrons viewed along (a) the  $a$ -axis and (c)  $c$ -axis direction, respectively.

**Table S6** The photoelectric properties of WLED fabricated by depositing the commercial red phosphor KSF:Mn<sup>4+</sup>, green phosphor  $\beta$ -SiAlON:Eu<sup>2+</sup> and as-synthesized blue phosphor KBPOF:1.5%Eu<sup>2+</sup> on a 380 nm n-UV LED chip under various drive currents.

| Current (mA) | CCT (K) | CIE-x  | CIE-y  | Ra   |
|--------------|---------|--------|--------|------|
| 20           | 5144    | 0.3402 | 0.3346 | 67.4 |
| 60           | 5506    | 0.3323 | 0.3357 | 66.9 |
| 120          | 5474    | 0.3330 | 0.3355 | 68.0 |
| 180          | 5674    | 0.3287 | 0.3357 | 67.7 |
| 240          | 5636    | 0.3295 | 0.3362 | 69.8 |
| 300          | 5692    | 0.3282 | 0.3370 | 70.1 |

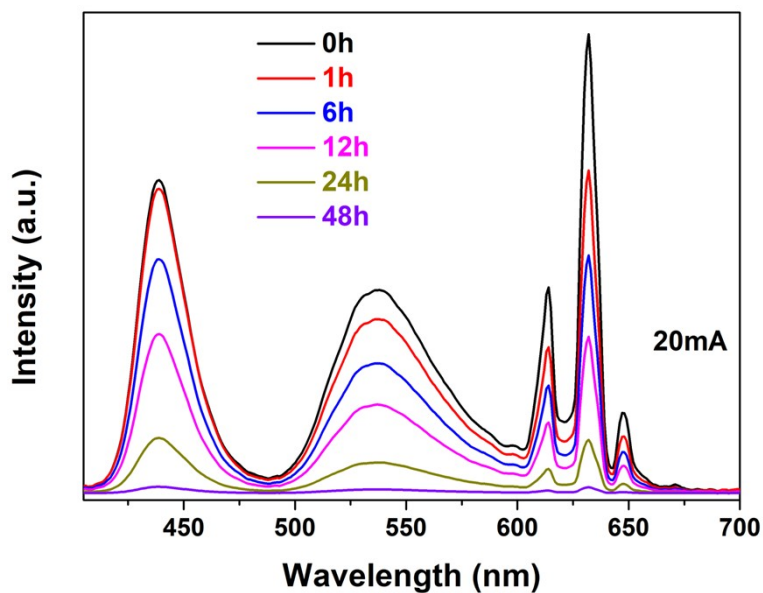

**Fig. S13** EL spectra of the as-fabricated WLED device measured at different working time.
